# Supplementary material for: Layer-by-layer assembly of Au and CdS nanoparticles on the surface of bacterial cells for photo-assisted bioanodes in microbial fuel cells
Source: Royal Society of Chemistry journal article supplement (doi:10.1039/d0tb02642e), 2021-01-01
Supplement: d0tb02642e1.pdf [file d0tb02642e1.pdf]

## Supporting Information

### **Layer-by-Layer assemble of Au and CdS nanoparticles on the surface of bacterial cell for photo-assisted bioanode in microbial fuel cells**

Pingping Li,<sup>a</sup> Yujing Jiang,<sup>a</sup> Rong-Bin Song,<sup>\*ab</sup> Jian-Rong Zhang<sup>\*ac</sup> and Jun-Jie Zhu<sup>a</sup>

<sup>a</sup> State Key Laboratory of Analytical Chemistry for Life Science, School of Chemistry and Chemical Engineering, Nanjing University, Nanjing 210023, P.R. China

E-mail: jrzhang@nju.edu.cn

<sup>b</sup> School of Ecology and Environment, Zhengzhou University, Zhengzhou 450001, P.R. China

E-mail: rbsong@zzu.edu.cn; rbsong@nju.edu.cn

<sup>c</sup> School of Chemistry and Life Science, Nanjing University Jinling College, Nanjing 210089, P.R. China

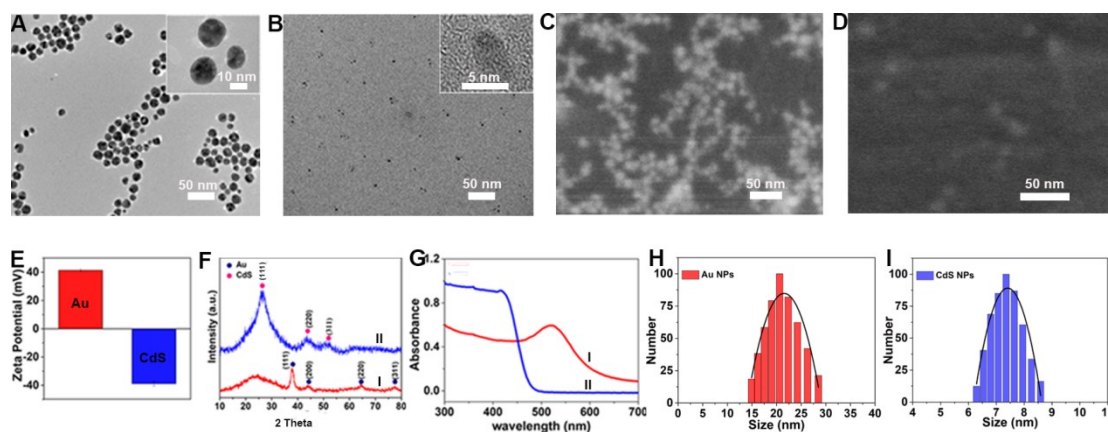

**Fig. S1** Transmission electron microscopy images of Au NPs (A) and CdS NPs (B). The inset is the enlarged view of the images. Scanning electron microscopy images of Au NPs (C) and CdS NPs (D).  $\zeta$ -potential (E), X-ray diffraction analysis (F) and UV-Visible spectroscopy analysis (G) of Au NPs (I) and CdS NPs (II). The hydrodynamic diameter of Au NPs (H) and CdS NPs (I). The size of Au NPs were about 10-15 nm while the size of CdS NPs were about 3-5 nm. Regular and uniform spherical shapes are observed for the Au NPs. The  $\zeta$ -potential of Au NPs and CdS NPs were  $41.3 \pm 0.9$  mV and  $-38.9 \pm 1.6$  mV respectively. In the XRD pattern, the peaks at  $2\theta = 38.2^\circ, 44.4^\circ, 64.6^\circ$  and  $77.6^\circ$  (curve I) correspond to (111), (200), (220) and (311) planes of Au NPs, while the peaks at  $2\theta = 26.4^\circ, 43.9^\circ, 51.9^\circ$ , can be assigned to (111), (220) and (311) planes of CdS NPs.<sup>1, 2</sup> As shown in Fig. S1G, there were obvious absorption peak at 525 nm (I) and 420 nm (II) in curve, corresponding to the absorption peaks of Au and CdS respectively.<sup>1,2</sup> Dynamic Light Scattering (DLS) revealed the hydrodynamic diameter of Au NPs were  $18.36 \pm 0.18$  nm while the hydrodynamic diameter of CdS NPs were  $7.29 \pm 0.14$  nm. As mentioned above, the positively-charged Au NPs and negatively-charged CdS NPs were successfully prepared.

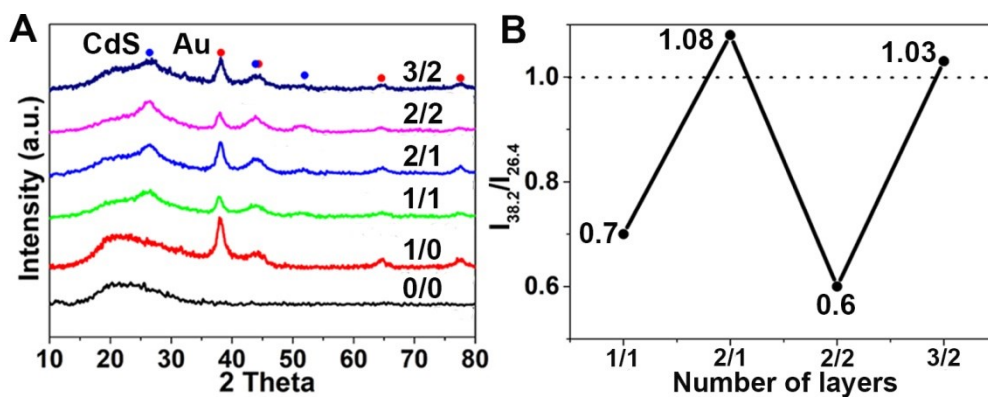

**Fig. S2** X-ray diffraction analysis of *E. coli* after each modification (A) and intensity ratio of peak at 38.2° to peak at 26.4° (B).

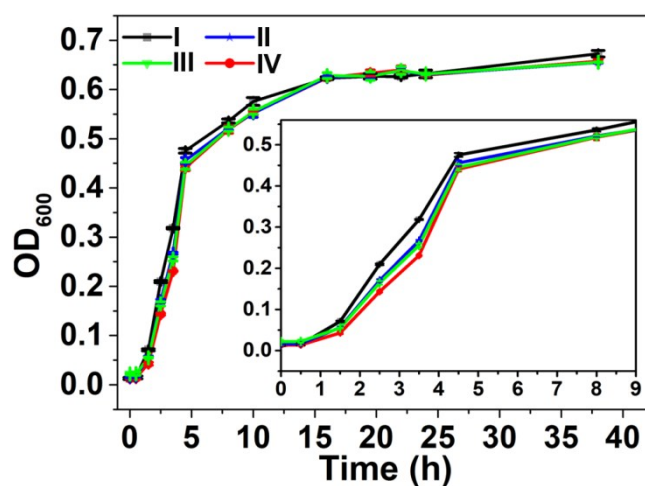

**Fig. S3** Cell-growth curves of native *E. coli* (I) and LbL self-assembled *E. coli* (II *E. coli*@Au<sub>1</sub>@CdS<sub>0</sub>, III *E. coli*@Au<sub>1</sub>@CdS<sub>1</sub>, and IV *E. coli*@Au<sub>3</sub>@CdS<sub>2</sub>). The inset is the enlarged view of the curves. Error bars represent standard error (s.e.) determined by three independent experiments.

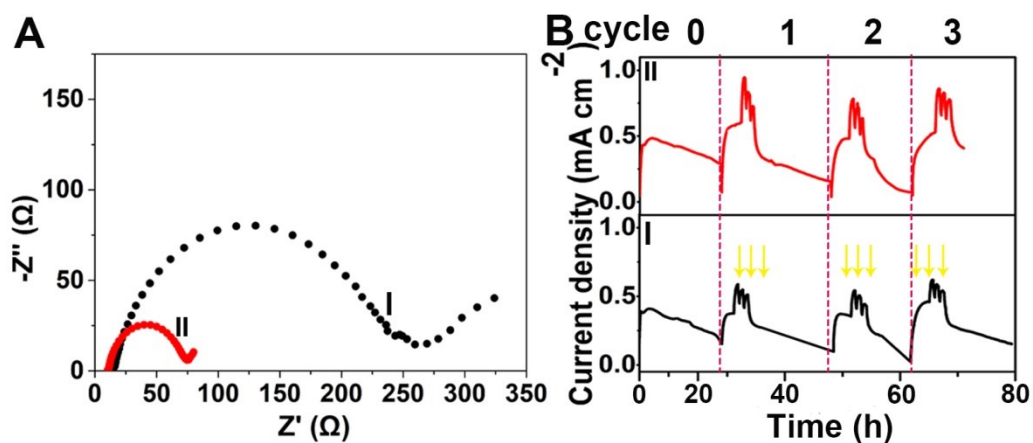

**Fig. S4** The Nyquist curves (A) and current-time curves (B) of photo-bioanode with LbL self-assembled *E. coli* (I *E. coli*@Au<sub>2</sub>@CdS<sub>2</sub> and II *E. coli*@Au<sub>3</sub>@CdS<sub>2</sub>). The frequency ranged from 10<sup>5</sup> to 10<sup>-3</sup> Hz, and the inset is the enlarged view of the curves.

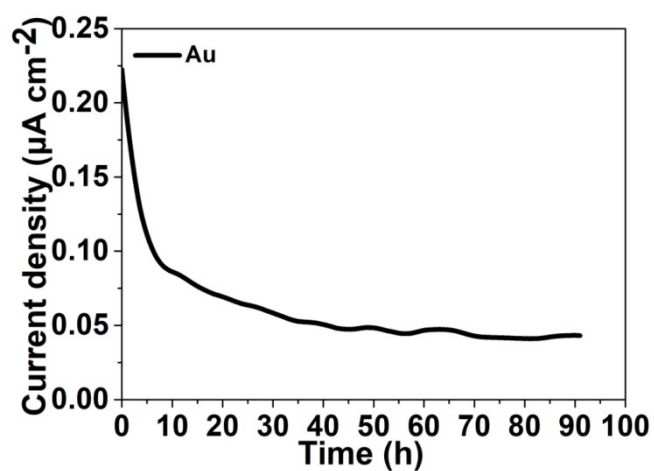

**Fig. S5** Current-time curve of electrode modified with Au NPs separately in the electrochemical cells (ECs) with the addition of 2-hydroxy-1, 4-naphthoquinone (HNQ) as mediator and the glucose as substrate.

**Table S1** The statistical table of current density produced by photo-bioanodes in dark condition and light illumination.

| Layer No.  | plateau current density in each cycle without light illumination (mA cm <sup>-2</sup> ) |      |      |      |           | average of three plateau currents densities in each cycle with light illumination (mA cm <sup>-2</sup> ) |      |      |           | averaged current density increment (mA cm <sup>-2</sup> ) | averaged current density increment / averaged plateau current density without light illumination |
|------------|-----------------------------------------------------------------------------------------|------|------|------|-----------|----------------------------------------------------------------------------------------------------------|------|------|-----------|-----------------------------------------------------------|--------------------------------------------------------------------------------------------------|
|            | 0                                                                                       | 1    | 2    | 3    | average   | 1                                                                                                        | 2    | 3    | average   |                                                           |                                                                                                  |
| <b>0/0</b> | 0.23                                                                                    | 0.21 | 0.16 | 0.15 | 0.19±0.04 | 0.27                                                                                                     | 0.24 | 0.20 | 0.24±0.04 | 0.05                                                      | 26.32%                                                                                           |
| <b>0/1</b> | 0.52                                                                                    | 0.53 | 0.48 | 0.40 | 0.48±0.06 | 0.66                                                                                                     | 0.65 | 0.53 | 0.61±0.07 | 0.12                                                      | 25.00%                                                                                           |
| <b>1/1</b> | 0.40                                                                                    | 0.40 | 0.36 | 0.37 | 0.38±0.02 | 0.52                                                                                                     | 0.53 | 0.47 | 0.51±0.03 | 0.13                                                      | 34.21%                                                                                           |
| <b>2/1</b> | 0.51                                                                                    | 0.52 | 0.57 | 0.51 | 0.53±0.03 | 0.80                                                                                                     | 0.80 | 0.76 | 0.79±0.02 | 0.26                                                      | 49.06%                                                                                           |
| <b>2/2</b> | 0.41                                                                                    | 0.37 | 0.37 | 0.46 | 0.4±0.04  | 0.54                                                                                                     | 0.49 | 0.57 | 0.53±0.04 | 0.13                                                      | 32.50%                                                                                           |
| <b>3/2</b> | 0.48                                                                                    | 0.60 | 0.48 | 0.53 | 0.52±0.03 | 0.84                                                                                                     | 0.73 | 0.83 | 0.80±0.06 | 0.28                                                      | 53.85%                                                                                           |

**Table S2** Comparison of the performance of previous photo-assisted MFCs employing biofilm-attached photoanodes and previous MFCs using functionalized bacterial cells.

| <b>Electrode Substrates</b> | <b>Photoanode Materials</b>                      | <b>Exoelectrogen Type</b>                            | <b>Maximum Power Density (mW m<sup>-2</sup>)</b> | <b>Ref.</b>      |
|-----------------------------|--------------------------------------------------|------------------------------------------------------|--------------------------------------------------|------------------|
| FTO                         | Fe <sub>2</sub> O <sub>3</sub>                   | <i>Shewanella oneidensis</i>                         | 185 (light)                                      | 3                |
| Crabon Felt                 | TiO <sub>2</sub> /TNT                            | sludge                                               | 1284 (light)                                     | 4                |
| /                           | Nb <sub>2</sub> O <sub>5</sub>                   | <i>Escherichia coli</i>                              | 1196 (light)                                     | 5                |
| FTO                         | Ag-TiO <sub>2</sub>                              | sludge                                               | 1850 (light)                                     | 6                |
| Graphite Felt               | TiO <sub>2</sub> /Fe <sub>2</sub> O <sub>3</sub> | sludge                                               | 638.3 (light)                                    | 7                |
| Carbon Felt                 | /                                                | carbon dots-coated<br><i>Shewanella oneidensis</i>   | 1697.9 (light)                                   | 8                |
| Carbon Cloth                | /                                                | carbon dots-fed<br><i>Shewanella oneidensis</i>      | 491 (dark)                                       | 9                |
| Carbon Felt                 | /                                                | PDA modified<br><i>S.xiamenensi</i>                  | 452.8 (dark)                                     | 10               |
| Carbon Cloth                | /                                                | Polypyrrole-coated<br><i>Shewanella oneidensis</i>   | 1479 (dark)                                      | 11               |
| <b>Carbon Felt</b>          | <b>/</b>                                         | <b>LbL self-assembled</b><br><i>Escherichia coli</i> | <b>1704.3 (dark)</b><br><b>2300.4 (light)</b>    | <b>This work</b> |

## References

1. R.-B. Song, S. Zhou, D. Guo, P. Li, L.-P. Jiang, J.-R. Zhang, X. Wu and J.-J. Zhu, *ACS Sustainable Chem. Eng.*, 2019, **8**, 1311-1318.
2. A. Aboulaich, D. Billaud, M. Abyan, L. Balan, J. J. Gaumet, G. Medjadhi, J. Ghanbaja and R. Schneider, *ACS Appl. Mater. Interfaces*, 2012, **4**, 2561-2569.
3. G. Zhu, Y. Yang, J. Liu, F. Liu, A. Lu and W. He, *Biosens. Bioelectron.*, 2017, **94**, 227-234.
4. H.-W. Kim, K.-S. Lee, A. Razzaq, S. H. Lee, C. A. Grimes and S.-I. In, *Energy Technol.*, 2018, **6**, 257-262.
5. M. Li, X. He, Y. Zeng, M. Chen, Z. Zhang, H. Yang, P. Fang, X. Lu and Y. Tong, *Chem. Sci.*, 2015, **6**, 6799-6805.
6. G. Lui, G. Jiang, M. Fowler, A. Yu and Z. Chen, *J. Power Sources*, 2019, **425**, 69-75.
7. G. Ren, Y. Sun, A. Lu, Y. Li and H. Ding, *J. Power Sources*, 2018, **408**, 46-50.
8. D. Guo, H.-F. Wei, R.-B. Song, J. Fu, X. Lu, R. Jelinek, Q. Min, J.-R. Zhang, Q. Zhang and J.-J. Zhu, *Nano Energy*, 2019, **63**, 103875.
9. C. Yang, H. Aslan, P. Zhang, S. Zhu, Y. Xiao, L. Chen, N. Khan, T. Boesen, Y. Wang, Y. Liu, L. Wang, Y. Sun, Y. Feng, F. Besenbacher, F. Zhao and M. Yu, *Nat. Commun.*, 2020, **11**, 1379.
10. S.-R. Liu, L.-F. Cai, L.-Y. Wang, X.-F. Yi, Y.-J. Peng, N. He, X. Wu and Y.-P. Wang, *Chem. Commun.*, 2019, **55**, 10535-10538.
11. R.-B. Song, Y. Wu, Z.-Q. Lin, J. Xie, C. H. Tan, J. S. C. Loo, B. Cao, J.-R. Zhang, J.-J. Zhu and Q. Zhang, *Angew. Chem. Int. Ed.*, 2017, **56**, 10516-10520.
